# Supplementary material
Source: Elsevier journal article supplement (https://comptes-rendus.academie-sciences.fr/biologies/article/10.1016/j.crvi.2017.09.003/file/attach/mmc1.pdf)
Supplement: mmc1 [file mmc1.pdf]

## Appendix I:

### Comparative material examined

*Hemidactylus aaronbaueri*: Holotype BNHS 1739 (male), Ghatghar, Taluka Junnar, Pune District, Maharashtra, India; ZSI 21648A and ZSI 21648C (female), ZSI 21648B (male), Bhairavgadh fort, Taluka Karjat, Pune District, Maharashtra, India.

*Hemidactylus acanthopholis*: Holotype NHM 1946.8.23.68 (male), paratypes NHM 1946.8.2367 (male), Tirunelveli District, Tamil Nadu.

*Hemidactylus albofasciatus*: Paratype ZSI 21109 (female), Dorle village, Rajapur Taluka, Ratnagiri District, Maharashtra, India; two males BNHS 1579 and 1582 Dabhil-Ambere, Ratnagiri District; Maharashtra, India.

*Hemidactylus bengaliensis* Anderson (= *H. flaviviridis*): Syntype ZSI 5780, Bengal.

*Hemidactylus flaviviridis*: ZSI 20963 (male) Jaipur, Rajasthan, India; ZSI 21688 (female) Udaipur, Rajasthan, India.

*Hemidactylus hunae*: Type specimen NHM 1946.8.23.77 (female), Okanda, Eastern Province, Sri Lanka.

*Hemidactylus giganteus*: Syntype, NHM 1877.8.6.5 (male), Godavari valley near Bhadrachalam, Andhra Pradesh, India.

*Hemidactylus gracilis*: Syntype, ZSI 5190 (male), from 'S.E. Berár' (in Madhya Pradesh, India; BNHS 1591 (male) and BNHS 1592 (female), Chatusringi hills, Pune, Maharashtra, India.

*Hemidactylus graniticulus*: Holotype BNHS 1850 (female), hills near Harohalli, Bangalore Rural district, Karnataka, India; paratypes NHM 1946.8.23.70 (female), NHM 1946.8.23.71 (female), NHM 1946.8.23.72 (male), NHM 1946.8.23.73 (female), NHM

1946.8.23.74 (female), NHM 1946.8.23.75 (female), Salem District, Tamil Nadu, India; NHM 1946.8.23.76 (male), 'Malabar', India.

*Hemidactylus gujaratensis*: Holotype BNHS 1818 (female) Vagheshwari Mata Temple, Junagadh City, Junagadh District, Gujarat, India.

*Hemidactylus kelaartii*: Syntypes ZSI 2617 (male) and ZSI 2618 (female), from 'Ceylon' (= Sri Lanka).

*Hemidactylus maculatus*: NHM 1956.1.11.41 (female), Matheran, Raigad District, Maharashtra, India; ZSI 25608 (male) Government rest house, Panchagani, Satara District, Maharashtra, India; BNHS 74 (female) and BNHS 75 (female), Mumbai, Maharashtra, India; BNHS 1086 (male), Kanheri caves, Mumbai, Maharashtra, India.

*Hemidactylus marmoratus* (= *Hemidactylus leschenaulti*): Holotype, ZSI 5058, from 'S. E. Berár, near Chánda' Maharashtra, India.

*Hemidactylus cf. murrayi*: BNHS 1947–1948 (males), BNHS 1949 (female), Aarey Milk Colony, Mumbai, Maharashtra.

*Hemidactylus persicus*: Holotype, ZSI 5961, from 'Persia' (= Iran). The register lists the type as from 'Shiraz, Persia'.

*Hemidactylus platyceps* (= *Hemidactylus gracilis*): Holotype, ZSI 17020, from 'Bilimora, Bombay Presidency' Gujarat, India.

*Hemidactylus prashadi*: BNHS 147 (male), Shirol forest, Belgaum North Kanara, Karnataka, India; BNHS 146 (male), Gersoppa falls, North Kanara, Karnataka, India; ZSI 20123 (female) neighbourhood of Jog, North Kanara district, Bombay Presidency' (at present in Karnataka, India.

***Hemidactylus reticulatus***: Type specimens NHM 1874.4.29.410 (male) and NHM 1874.4.29.411 (female), Kollegal, Karnataka, India.

***Hemidactylus sataraensis***: Holotype BNHS 1743 (female) Chalakewadi, Satara District, Maharashtra, India; paratype BNHS 1742 (female); non-type BNHS 2288 (male), BNHS 2289 (female), Chalakewadi, Satara District, Maharashtra, India.

***Hemidactylus scabriceps***: Type specimens, ZSI 15353, from 'Rámanád', Tamil Nadu, India.

***Hemidactylus sykesii* (= *H. maculatus*)**: Type specimen, NHM XXII.20a (male), Deccan, India (Donated by Indian Museum XXII.20a).

***Hemidactylus subtriedroides***: Syntype, NHM 1946.8.25.54/ZSI 4135, "Tsagain, Upper Burma".

***Hemidactylus treutleri***: Holotype ZSI 25711 (male), paratype ZSI 25712 (female), outer stone wall of Golconda Fort, Hyderabad, Andhra Pradesh, India.

***Hemidactylus triedrus***: ZSI 17054 (female) Travindrum, Kerala, India; ZSI 5852, ZSI 5853 (males), Bangalore, Karnataka, India; ZSI 21483, ZSI 21486 (males), Pune, Maharashtra, India
